# Supplementary material for: Estimating private sector out-of-pocket expenditures on family planning commodities in low-and-middle-income countries
Source: PubMed Central journal article supplement — BMJ Glob Health. 2021 Apr 12;6(4):e004635. doi: 10.1136/bmjgh-2020-004635 (PMC8048017; doi:10.1136/bmjgh-2020-004635), 2021-04-12
Supplement: bmjgh-2020-004635supp002.pdf [file bmjgh-2020-004635supp002.pdf]

**Unit Price Data Sources Used by Country**

|                      | DHS | PMA2020 | IQVIA | FPWatch | Other Private |
|----------------------|-----|---------|-------|---------|---------------|
| Afghanistan          |     |         |       |         | x             |
| Albania              | x   |         |       |         |               |
| Algeria              |     |         | x     |         |               |
| Angola               |     |         |       |         | x             |
| Azerbaijan           | x   |         |       |         |               |
| Bangladesh           |     |         | x     |         |               |
| Benin                | x   |         | x     |         |               |
| Bolivia              | x   |         |       |         |               |
| Bosnia & Herzegovina |     |         | x     |         |               |
| Brazil               |     |         | x     |         |               |
| Bulgaria             |     |         | x     |         |               |
| Burkina Faso         |     | x       | x     |         |               |
| Burundi              |     |         |       |         | x             |
| Cambodia             | x   |         |       |         |               |
| Cameroon             |     |         | x     |         |               |
| Chad                 |     |         | x     |         |               |
| Colombia             |     |         | x     |         |               |
| Congo                |     |         | x     |         |               |
| Congo, DR            |     |         |       | x       | x             |
| Ecuador              |     |         | x     |         |               |
| Egypt                | x   |         | x     |         |               |
| Ethiopia             |     | x       |       | x       | x             |
| Gabon                |     |         | x     |         |               |
| Ghana                | x   | x       |       |         | x             |
| Guatemala            |     |         | x     |         |               |
| Guinea               |     |         | x     |         |               |
| Guyana               | x   |         |       |         |               |
| Haiti                | x   |         |       |         |               |
| Honduras             | x   |         |       |         |               |
| India                |     |         | x     | x       | x             |
| Indonesia            | x   |         | x     |         | x             |
| Jordan               | x   |         | x     |         |               |
| Kazakhstan           |     |         | x     |         |               |
| Kenya                | x   | x       |       |         | x             |
| Lebanon              |     |         | x     |         |               |
| Liberia              | x   |         |       |         |               |
| Madagascar           | x   |         |       |         | x             |
| Malawi               |     |         |       |         | x             |
| Malaysia             |     |         | x     |         |               |
| Maldives             | x   |         |       |         |               |
| Mali                 |     |         | x     |         |               |
| Mexico               |     |         | x     |         |               |

|                    | DHS | PMA2020 | IQVIA | FPWatch | Other Private |
|--------------------|-----|---------|-------|---------|---------------|
| Morocco            |     |         | x     |         |               |
| Myanmar            |     |         |       | x       |               |
| Namibia            | x   |         |       |         |               |
| Nepal              | x   |         |       |         |               |
| Niger              | x   | x       | x     |         | x             |
| Nigeria            | x   | x       |       | x       |               |
| Pakistan           | x   |         | x     |         | x             |
| Peru               | x   |         | x     |         |               |
| Philippines        | x   |         | x     |         |               |
| Romania            |     |         | x     |         |               |
| Russian Federation |     |         | x     |         |               |
| Senegal            |     |         | x     |         | x             |
| Serbia             |     |         | x     |         |               |
| Sierra Leone       | x   |         |       |         |               |
| South Africa       |     |         | x     |         | x             |
| Sri Lanka          |     |         | x     |         |               |
| Swaziland          | x   |         |       |         |               |
| Tanzania           | x   |         |       |         | x             |
| Thailand           |     |         | x     |         |               |
| Togo               |     |         | x     |         |               |
| Tunisia            |     |         | x     |         |               |
| Turkey             |     |         | x     |         |               |
| Uganda             | x   | x       |       |         | x             |
| Ukraine            | x   |         |       |         |               |
| Vietnam            |     |         | x     |         |               |
| Zambia             | x   |         |       |         |               |
| Zimbabwe           | x   |         |       |         |               |
