# Supplementary material for: Estimating private sector out-of-pocket expenditures on family planning commodities in low-and-middle-income countries
Source: PubMed Central journal article supplement — BMJ Glob Health. 2021 Apr 12;6(4):e004635. doi: 10.1136/bmjgh-2020-004635 (PMC8048017; doi:10.1136/bmjgh-2020-004635), 2021-04-12
Supplement: bmjgh-2020-004635supp003.pdf [file bmjgh-2020-004635supp003.pdf]

Private OOP in 2019 by FP Method and Subsidy

| Country              | GNI Group           | Sterilization   |             | Implant         |             | IUD             |             | Injectable      |             | Pill            |             | Condom          |             | Other           |             | Total (all methods) |              |
|----------------------|---------------------|-----------------|-------------|-----------------|-------------|-----------------|-------------|-----------------|-------------|-----------------|-------------|-----------------|-------------|-----------------|-------------|---------------------|--------------|
|                      |                     | Private Non-Sub | Private Sub | Private Non-Sub     | Private Sub  |
| Afghanistan          | Low income          | \$16,103        | \$28,856    | \$0             | \$11,472    | \$0             | \$3,952     | \$589,683       | \$63,108    | \$1,563,104     | \$348,698   | \$407,997       | \$125,828   | \$0             | \$0         | \$2,576,887         | \$581,914    |
| Albania              | Upper-middle income | \$0             | **          | \$0             | **          | \$0             | \$9,877     | \$0             | \$1,858     | \$1,159,179     | \$0         | \$131,817       | \$0         | \$6,548         | \$0         | \$1,307,421         | \$1,858      |
| Algeria              | Upper-middle income | \$1,644         | \$0         | \$356,408       | \$0         | \$47,587        | \$0         | \$48,310        | \$0         | \$28,840,430    | \$0         | \$249,869       | \$0         | \$13,325        | \$0         | \$29,557,573        | \$0          |
| Angola               | Lower-middle income | **              | \$0         | \$74,095        | \$2,130     | \$0             | **          | \$228,960       | \$0         | \$2,064,928     | \$3,554     | \$1,213,407     | \$44,012    | \$68,865        | \$542       | \$3,650,254         | \$50,239     |
| Armenia              | Upper-middle income | \$117           | \$0         | **              | \$0         | \$4,647         | \$0         | \$13,628        | \$0         | \$648,029       | \$0         | \$206,789       | \$0         | \$4,672         | \$0         | \$877,881           | \$0          |
| Azerbaijan           | Upper-middle income | \$1,089         | \$0         | \$187           | \$0         | \$23,557        | \$0         | \$2,646         | \$0         | \$1,289,867     | \$0         | \$187,852       | \$0         | \$56,844        | \$0         | \$1,562,041         | \$0          |
| Bangladesh           | Lower-middle income | \$287,514       | \$115,453   | \$0             | \$66,582    | \$0             | \$1,374     | \$7,901,278     | \$1,594,777 | \$14,085,544    | \$7,004,263 | \$5,117,868     | \$1,296,438 | \$0             | \$0         | \$27,392,205        | \$10,078,885 |
| Belarus              | Upper-middle income | \$343           | \$0         | \$56,089        | \$0         | \$179,386       | \$0         | \$17,279        | \$0         | \$11,051,200    | \$0         | \$1,164,636     | \$0         | \$20,899        | \$0         | \$12,489,833        | \$0          |
| Belize               | Upper-middle income | \$3,974         | \$0         | \$10,470        | \$0         | \$2,052         | \$0         | \$82,646        | \$0         | \$458,941       | \$0         | \$16,554        | \$0         | \$1,153         | \$0         | \$575,790           | \$0          |
| Benin                | Low income          | \$3,180         | \$0         | \$40,239        | \$0         | \$717           | \$0         | \$79,894        | \$36,592    | \$144,244       | \$34,420    | \$193,489       | \$91,472    | \$89,777        | \$94,515    | \$510,584           | \$297,955    |
| Bhutan               | Lower-middle income | \$4,425         | \$0         | \$3,301         | \$0         | \$2,630         | \$0         | \$111,201       | \$0         | \$237,002       | \$0         | \$16,762        | \$0         | \$190           | \$0         | \$375,511           | \$0          |
| Bolivia              | Lower-middle income | \$47,201        | \$0         | \$235,821       | \$0         | \$378,152       | \$0         | \$1,329,976     | \$0         | \$2,067,864     | \$0         | \$2,069,324     | \$0         | \$120,422       | \$0         | \$6,248,759         | \$0          |
| Bosnia & Herzegovina | Upper-middle income | \$0             | \$0         | \$32,535        | \$0         | \$353           | \$0         | \$926,531       | \$0         | \$926,531       | \$0         | \$186,191       | \$0         | \$10,205        | \$0         | \$1,155,815         | \$0          |
| Botswana             | Upper-middle income | \$591           | \$0         | \$10,922        | \$0         | \$1,307         | \$0         | \$30,036        | \$0         | \$22,163        | \$0         | \$65,820        | \$15,767    | \$9,414         | \$0         | \$134,254           | \$15,767     |
| Brazil               | Upper-middle income | \$2,383,269     | \$0         | \$4,022,490     | \$0         | \$2,978,597     | \$0         | \$50,287,855    | \$0         | \$949,407,997   | \$0         | \$15,020,616    | \$0         | \$1,548,242     | \$0         | \$1,025,649,066     | \$0          |
| Bulgaria             | Upper-middle income | \$223           | \$0         | \$2,394         | \$0         | \$85,544        | \$0         | \$723           | \$0         | \$3,707,973     | \$0         | \$825,024       | \$0         | \$93,488        | \$0         | \$4,705,368         | \$0          |
| Burkina Faso         | Low income          | **              | \$11,496    | \$15,751        | \$0         | **              | \$61,703    | \$9,407         | \$41,517    | \$13,256        | \$207,514   | \$24,289        | \$23,025    | \$7,058         | \$445,254   | \$69,761            |              |
| Burundi              | Low income          | \$2,035         | \$0         | \$45,707        | \$674       | \$875           | \$111       | \$206,768       | \$1,868     | \$14,354        | \$1,143     | \$38,613        | \$16,548    | \$5,666         | \$172       | \$314,018           | \$20,517     |
| Cabo Verde           | Lower-middle income | \$2,371         | \$0         | \$10,255        | \$0         | \$1,390         | \$0         | \$17,379        | \$0         | \$63,537        | \$0         | \$19,871        | \$0         | \$7,435         | \$0         | \$122,238           | \$0          |
| Cambodia             | Lower-middle income | \$17,268        | \$0         | \$568,853       | \$15,527    | \$9,462         | \$3,876     | \$100,900       | \$5,921     | \$0             | \$40,882    | \$21,591        | \$113,590   | \$0             | **          | \$718,073           | \$179,796    |
| Cameroon             | Lower-middle income | \$526           | \$0         | \$87,761        | \$53,966    | \$0             | \$347       | \$905,573       | \$58,338    | \$378,452       | \$22,718    | \$1,889,468     | \$130,576   | \$65,025        | \$35,255    | \$3,266,806         | \$301,201    |
| CAR                  | Low income          | \$799           | \$0         | \$25,291        | \$0         | \$218           | \$0         | \$24,540        | \$0         | \$437,142       | \$0         | \$109,536       | \$0         | \$31,820        | \$0         | \$629,257           | \$0          |
| Chad                 | Low income          | \$524           | \$0         | \$27,481        | \$0         | **              | \$0         | \$177,605       | \$0         | \$25,942        | \$0         | \$70,150        | \$0         | \$2,485         | \$0         | \$304,188           | \$0          |
| Colombia             | Upper-middle income | \$1,480,766     | \$0         | \$1,200,638     | \$0         | \$1,441,018     | \$0         | \$31,046,457    | \$0         | \$86,804,662    | \$0         | \$2,042,258     | \$0         | \$23,145        | \$0         | \$124,038,944       | \$0          |
| Comoros              | Low income          | \$104           | \$0         | \$3,134         | \$0         | **              | \$0         | \$3,020         | \$0         | \$5,508         | \$0         | \$5,142         | \$0         | **              | \$0         | \$13,907            | \$0          |
| Congo                | Lower-middle income | \$171           | \$0         | \$140,187       | \$0         | \$554           | \$0         | \$60,055        | \$0         | \$241,399       | \$0         | \$450,469       | \$0         | \$118,146       | \$0         | \$1,010,981         | \$0          |
| Congo, DR            | Low income          | \$11,704        | \$0         | \$0             | \$156,782   | \$0             | \$945       | \$0             | \$462,664   | \$0             | \$222,787   | \$2,766,635     | \$337,076   | \$0             | \$544,441   | \$2,588,339         | \$1,724,095  |
| Costa Rica           | Upper-middle income | \$63,372        | \$0         | \$24,099        | \$0         | \$37,047        | \$0         | \$1,017,508     | \$0         | \$12,680,204    | \$0         | \$359,820       | \$26,109    | \$6,660         | \$0         | \$14,188,712        | \$26,109     |
| Côte d'Ivoire        | Lower-middle income | \$16,187        | \$0         | \$776,719       | \$0         | \$0             | \$475       | \$135,018       | \$84,903    | \$593,983       | \$508,286   | \$688,445       | \$299,572   | \$53,809        | \$255,498   | \$2,264,162         | \$1,148,733  |
| Cuba                 | Upper-middle income | \$106,408       | \$0         | \$41,055        | \$0         | \$1,289,796     | \$0         | \$169,131       | \$0         | \$10,054,960    | \$0         | \$11,056,504    | \$0         | \$43,993        | \$0         | \$4,546,404         | \$0          |
| Djibouti             | Lower-middle income | **              | \$0         | \$9,208         | \$0         | \$120           | \$0         | \$17,352        | \$0         | \$76,168        | \$0         | \$14,148        | \$0         | \$5,776         | \$0         | \$122,772           | \$0          |
| Dominica             | Upper-middle income | \$408           | \$0         | \$292           | \$0         | \$511           | \$0         | \$12,598        | \$0         | \$96,433        | \$0         | \$2,974         | \$0         | \$132           | \$0         | \$113,348           | \$0          |
| Dominican Republic   | Upper-middle income | \$226,590       | \$0         | \$92,882        | \$0         | \$117,071       | \$0         | \$589,302       | \$0         | \$17,864,315    | \$0         | \$317,395       | \$0         | \$33,296        | \$0         | \$19,241,211        | \$0          |
| Ecuador              | Upper-middle income | \$270,301       | \$0         | \$677,228       | \$0         | \$1,165,431     | \$0         | \$4,396,907     | \$0         | \$15,929,742    | \$0         | \$243,293       | \$0         | \$80,638        | \$0         | \$22,763,540        | \$0          |
| Egypt                | Lower-middle income | \$92,100        | \$0         | \$113,624       | \$0         | \$246,344       | \$137,622   | \$1,702,438     | **          | \$16,891,449    | \$0         | \$110,770       | \$12,029    | \$52,463        | \$0         | \$19,209,189        | \$149,651    |
| El Salvador          | Lower-middle income | \$63,465        | \$0         | \$13,460        | \$0         | \$17,986        | \$0         | \$2,505,364     | \$0         | \$1,666,176     | \$0         | \$106,534       | \$0         | \$1,236         | \$0         | \$4,364,222         | \$0          |
| Equatorial Guinea    | Upper-middle income | \$669           | \$0         | \$6,298         | \$0         | \$742           | \$0         | \$20,429        | \$0         | \$35,417        | \$0         | \$22,258        | \$0         | \$2,453         | \$0         | \$88,265            | \$0          |
| Eritrea              | Low income          | \$991           | \$0         | \$7,185         | \$0         | \$1,918         | \$0         | \$14,176        | \$0         | \$70,438        | \$0         | \$27,414        | \$0         | \$596           | \$0         | \$122,718           | \$0          |
| Ethiopia             | Low income          | \$5,803         | \$1,782     | \$0             | \$60,288    | \$0             | \$1,742     | \$0             | \$1,188,719 | \$0             | \$452,973   | \$0             | \$12,888    | \$9,809         | \$0         | \$113,729           | \$28,691     |
| Fiji                 | Upper-middle income | \$2,709         | \$0         | \$3,160         | \$0         | \$6,851         | \$0         | \$30,736        | \$0         | \$345,277       | \$0         | \$24,187        | \$0         | \$1,202         | \$0         | \$414,123           | \$0          |
| Gabon                | Upper-middle income | \$201           | \$0         | \$43,761        | \$214       | \$0             | **          | \$13,662        | \$0         | \$282,816       | \$0         | \$259,824       | \$605       | \$32,776        | \$511       | \$633,040           | \$1,330      |
| Gambia               | Low income          | \$231           | \$0         | \$6,662         | \$0         | \$1,105         | \$0         | \$53,496        | \$0         | \$40,719        | \$0         | \$10,683        | \$0         | \$585           | \$0         | \$113,480           | \$0          |
| Georgia              | Lower-middle income | **              | \$0         | \$144           | \$0         | \$8,771         | \$0         | \$945           | \$0         | \$1,132,288     | \$0         | \$250,596       | \$0         | \$29,105        | \$0         | \$1,421,850         | \$0          |
| Ghana                | Lower-middle income | \$6,744         | \$1,463     | \$0             | \$45,750    | \$0             | \$395       | \$0             | \$17,246    | \$12,365        | \$268,757   | \$366,520       | \$113,413   | \$613           | \$518,576   | \$376,242           | \$965,601    |
| Grenada              | Upper-middle income | \$302           | \$0         | \$468           | \$0         | \$1,299         | \$0         | \$16,940        | \$0         | \$136,052       | \$0         | \$9,187         | \$0         | \$208           | \$0         | \$164,455           | \$0          |
| Guatemala            | Upper-middle income | \$352,710       | \$0         | \$279,904       | \$0         | \$97,633        | \$0         | \$1,865,938     | \$0         | \$5,276,123     | \$0         | \$266,939       | \$0         | \$2,477         | \$0         | \$8,141,724         | \$0          |
| Guinea               | Low income          | **              | \$0         | \$182,277       | \$0         | \$0             | **          | \$213,621       | \$0         | \$224,562       | \$0         | \$13,964        | \$273,180   | \$79,120        | \$0         | \$713,544           | \$273,180    |
| Guinea-Bissau        | Low income          | \$464           | \$0         | \$55,633        | \$0         | \$18,348        | \$156       | \$12,881        | \$0         | \$22,572        | \$0         | \$64,682        | \$2,783     | \$19,245        | \$0         | \$193,825           | \$2,939      |
| Guyana               | Upper-middle income | \$814           | \$0         | \$9,557         | \$0         | \$21,220        | \$0         | \$18,055        | \$0         | \$367,131       | \$0         | \$43,215        | \$0         | \$2,939         | \$0         | \$462,931           | \$0          |
| Haiti                | Low income          | \$4,259         | \$0         | \$25,575        | \$0         | \$4,608         | \$0         | \$914,527       | \$0         | \$200,796       | \$0         | \$296,990       | \$0         | \$1,275         | \$0         | \$1,447,990         | \$0          |
| Honduras             | Lower-middle income | \$148,542       | \$0         | \$46,945        | \$0         | \$151,359       | \$0         | \$1,675,356     | \$0         | \$3,617,844     | \$0         | \$151,106       | \$0         | \$1,554         | \$0         | \$5,792,705         | \$0          |
| India                | Upper-middle income | \$11,799,935    | \$19,641    | \$2,436,214     | \$170       | \$3,434,803     | \$56,272    | \$0             | \$3,339     | \$79,007,944    | \$3,413,961 | \$36,587,587    | \$4,162,960 | \$1,410,393     | \$413,944   | \$134,676,876       | \$8,070,288  |
| Indonesia            | Lower-middle income | \$507,592       | \$0         | \$3,883,134     | \$0         | \$12,336,524    | \$0         | \$91,180,764    | \$0         | \$50,111,939    | \$0         | \$229,304       | \$0         | \$236,318       | \$0         | \$158,485,575       | \$0          |
| Iran                 | Upper-middle income | \$387,510       | \$0         | \$332,199       | \$0         | \$1,082,739     | \$0         | \$1,253,060     | \$0         | \$60,814,341    | \$0         | \$4,566,079     | \$0         | \$125,923       | \$0         | \$68,561,852        | \$0          |
| Iraq                 | Upper-middle income | \$30,303        | \$0         | \$36,936        | \$0         | \$303,757       | \$0         | \$713,477       | \$0         | \$27,559,615    | \$0         | \$204,952       | \$0         | \$21,357        | \$0         | \$28,870,396        | \$0          |
| Jamaica              | Upper-middle income | \$10,378        | \$0         | \$12,587        | \$0         | \$15,176        | \$0         | \$119,993       | \$0         | \$3,165,827     | \$0         | \$244,672       | \$0         | \$7,791         | \$0         | \$3,576,424         | \$0          |
| Jordan               | Upper-middle income | \$4,477         | \$0         | \$20,671        | \$0         | \$419,177       | \$0         | \$14,472        | \$0         | \$5,629,785     | \$0         | \$198,448       | \$0         | \$11,353        | \$0         | \$6,298,383         | \$0          |
| Kazakhstan           | Upper-middle income | \$173           | \$0         | \$287           | \$0         | \$95,384        | \$0         | \$6,141         | \$0         | \$3,988,633     | \$0         | \$688,749       | **          | \$15,820        | \$0         | \$4,795,186         | **           |
| Kenya                | Lower-middle income | \$60,799        | \$716       | \$0             | \$1,332,313 | \$0             | \$8,253     | \$5,353,189     | \$301,387   | \$70,346        | \$455,032   | \$230,171       | \$457,760   | \$30,187        | \$128,514   | \$5,674,346         | \$2,683,975  |
| Kiribati             | Lower-middle income | \$189           | \$0         | \$2,046         | \$0         | \$246           | \$0         | \$7,593         | \$0         | \$17,953        | \$0         | \$1,272         | \$0         | \$186           | \$0         | \$29,484            | \$0          |
| Korea DPR            | Low income          | \$21,957        | \$0         | \$25,614        | \$0         | \$1,168,931     | \$0         | \$46,372        | \$0         | \$506,679       | \$0         | \$118,457       | \$0         | \$169,218       | \$0         | \$2,057,228         | \$0          |
| Kyrgyzstan           | Lower-middle income | \$744           | \$0         | \$1,123         | \$0         | \$33,319        | \$0         | \$12,079        | \$0         | \$1,181,158     | \$0         | \$317,253       | \$0         | **              | \$0         | \$1,544,677         | \$0          |
| Laos PDR             | Lower-middle income | \$11,087        | \$0         | \$103,767       | \$0         | \$19,123        | \$0         | \$367,165       | \$0         | \$8,267,465     | \$0         | \$13,710        | \$20,251    | \$8,031         | \$0         | \$8,790,348         | \$20,251     |
| Lebanon              | Upper-middle income | \$1,099         | \$0         | \$6,307         | \$0         | \$57,777        | \$0         | \$3,832         | \$0         | \$4,778,674     | \$0         | \$58,043        | \$0         | \$7,909         | \$0         | \$4,913,642         | \$0          |
| Lesotho              | Lower-middle income |                 |             |                 |             |                 |             |                 |             |                 |             |                 |             |                 |             |                     |              |

| Country               | GNI Group           | Sterilization   |             | Implant         |             | IUD             |             | Injectable      |              | Pill            |              | Condom          |              | Other           |             | Total (all methods) |              |           |
|-----------------------|---------------------|-----------------|-------------|-----------------|-------------|-----------------|-------------|-----------------|--------------|-----------------|--------------|-----------------|--------------|-----------------|-------------|---------------------|--------------|-----------|
|                       |                     | Private Non-Sub | Private Sub  | Private Non-Sub | Private Sub  | Private Non-Sub | Private Sub  | Private Non-Sub | Private Sub | Private Non-Sub     | Private Sub  |           |
| Moldova               | Lower-middle income | \$317           | \$0         | \$1,645         | \$0         | \$147,087       | \$0         | \$660           | \$0          | \$2,980,747     | \$0          | \$289,515       | \$0          | \$17,356        | \$0         | \$3,437,328         | \$0          |           |
| Mongolia              | Lower-middle income | \$2,694         | \$0         | \$4,068         | \$0         | \$71,499        | \$0         | \$59,791        | \$0          | \$1,258,767     | \$0          | \$144,355       | \$0          | \$2,593         | \$0         | \$1,543,767         | \$0          |           |
| Montenegro            | Upper-middle income | **              | \$0         | **              | \$0         | \$6,519         | \$0         | **              | \$0          | \$325,025       | \$0          | \$37,877        | \$0          | \$0             | \$0         | \$369,421           | \$0          |           |
| Morocco               | Lower-middle income | \$2,854         | \$0         | \$30,268        | \$0         | \$45,731        | \$0         | \$1,453         | \$0          | \$38,734,272    | \$0          | \$9,161         | \$0          | \$506,033       | \$0         | \$39,329,771        | \$0          |           |
| Mozambique            | Low income          | \$813           | \$0         | \$0             | \$40,810    | \$0             | \$683       | \$0             | \$232,759    | \$11,541        | \$501,265    | \$47,234        | \$605,834    | \$273,552       | \$34,300    | \$18,421            | \$1,374,971  | \$392,242 |
| Myanmar               | Lower-middle income | \$102,256       | \$0         | \$103,153       | \$85,787    | \$69,217        | \$14,841    | \$1,735,274     | \$1,213,812  | \$1,475,411     | \$1,611,047  | \$121,841       | \$52,218     | \$449           | \$1,513     | \$3,607,601         | \$2,979,218  |           |
| Namibia               | Upper-middle income | \$3,345         | \$0         | \$53,033        | \$0         | \$19,793        | \$0         | \$155,339       | \$0          | \$360,318       | \$0          | \$143,536       | \$0          | \$18,580        | \$0         | \$753,945           | \$0          |           |
| Nauru                 | Upper-middle income | **              | \$0         | **              | \$0         | **              | \$0         | \$381           | \$0          | \$1,168         | \$0          | \$103           | **           | **              | \$0         | \$1,652             | **           |           |
| Nepal                 | Low income          | \$319,124       | \$46,506    | \$0             | \$49,404    | \$33,015        | \$2,079     | \$0             | \$162,175    | \$81,345        | \$246,071    | \$422,633       | \$159,559    | \$1,350         | \$10,013    | \$857,467           | \$675,807    |           |
| Nicaragua             | Lower-middle income | \$96,151        | \$0         | \$30,936        | \$0         | \$63,731        | \$0         | \$1,707,444     | \$0          | \$3,712,659     | \$0          | \$148,667       | \$0          | \$4,580         | \$0         | \$5,762,168         | \$0          |           |
| Niger                 | Low income          | \$362           | \$0         | \$4,727         | \$4,777     | \$0             | **          | \$155,562       | \$198        | \$450,591       | \$259        | **              | \$0          | \$5,535         | **          | \$616,777           | \$5,233      |           |
| Nigeria               | Lower-middle income | \$72,004        | \$593       | \$215,660       | \$734,333   | \$0             | \$5,158     | \$1,356,155     | \$3,505,432  | \$1,227,615     | \$767,862    | \$4,825,532     | \$1,723,018  | \$369,130       | \$1,564,986 | \$8,066,096         | \$8,301,381  |           |
| Pakistan              | Lower-middle income | \$1,025,055     | \$29,757    | \$31,967        | \$9,778     | \$0             | \$41,850    | \$1,084,778     | \$766,696    | \$1,104,073     | \$299,257    | \$7,247,658     | \$1,284,525  | \$110,861       | \$117,829   | \$10,604,392        | \$2,549,691  |           |
| Palestine             | Lower-middle income | \$1,156         | \$0         | \$1,245         | \$0         | \$80,244        | \$0         | \$15,039        | \$0          | \$1,256,894     | \$0          | \$72,976        | \$0          | \$2,423         | \$0         | \$1,429,978         | \$0          |           |
| Papua New Guinea      | Lower-middle income | \$22,423        | \$1,239     | \$0             | \$1,224     | \$0             | **          | \$487,831       | \$1,906      | \$1,902,010     | \$334        | \$26,407        | \$44,090     | \$1,445         | \$273       | \$2,440,117         | \$49,066     |           |
| Paraguay              | Upper-middle income | \$41,204        | \$0         | \$105,427       | \$0         | \$310,982       | \$0         | \$5,892,592     | \$0          | \$18,289,623    | \$0          | \$428,961       | \$0          | \$12,362        | \$0         | \$25,081,151        | \$0          |           |
| Peru                  | Upper-middle income | \$50,466        | \$0         | \$201,728       | \$0         | \$173,103       | \$0         | \$6,057,789     | \$0          | \$18,488,384    | \$0          | \$1,665,139     | \$0          | \$77,024        | \$0         | \$26,713,633        | \$0          |           |
| Philippines           | Lower-middle income | \$230,778       | \$0         | \$306,573       | \$0         | \$242,119       | \$0         | \$688,072       | \$0          | \$40,712,785    | \$0          | \$608,927       | \$0          | \$65,775        | \$0         | \$42,855,029        | \$0          |           |
| Romania               | Upper-middle income | \$1,128         | \$0         | \$16,878        | \$0         | \$277,684       | \$0         | \$156,425       | \$0          | \$17,347,398    | \$0          | \$2,619,455     | \$0          | \$408,275       | \$0         | \$20,827,242        | \$0          |           |
| Russian Federation    | Upper-middle income | \$2,653         | \$0         | \$51,584        | \$0         | \$2,309,221     | \$0         | \$11,912        | \$0          | \$294,736,266   | \$0          | \$15,277,286    | \$0          | \$39,560        | \$0         | \$312,428,483       | \$0          |           |
| Rwanda                | Low income          | \$919           | \$0         | \$90,852        | \$0         | \$10,257        | \$0         | \$67,772        | \$16,368     | \$0             | \$18,624     | \$55,206        | \$23,660     | \$369           | \$1,077     | \$225,375           | \$59,728     |           |
| Samoa                 | Upper-middle income | \$271           | \$0         | \$522           | \$0         | \$167           | \$0         | \$9,876         | \$0          | \$37,237        | \$0          | \$624           | \$0          | **              | \$0         | \$48,698            | \$0          |           |
| São Tomé and Príncipe | Upper-middle income | **              | \$0         | \$943           | \$0         | \$171           | \$0         | \$988           | \$0          | \$117           | \$0          | \$3,993         | \$0          | \$145           | \$0         | \$6,358             | \$0          |           |
| Senegal               | Low income          | \$807           | \$0         | \$0             | \$24,763    | \$0             | \$807       | \$4,699         | \$12,227     | \$59,435        | \$37,687     | \$6,333         | \$63,039     | \$2,401         | \$6,230     | \$73,675            | \$144,753    |           |
| Serbia                | Upper-middle income | **              | \$0         | \$296           | \$0         | \$24,182        | \$0         | \$1,148         | \$0          | \$3,246,134     | \$0          | \$917,235       | \$0          | \$6,454         | \$0         | \$4,195,450         | \$0          |           |
| Sierra Leone          | Low income          | \$3,781         | \$177       | \$0             | \$43,645    | \$0             | **          | \$302,020       | \$14,548     | \$444,631       | \$2,212      | \$4,317         | \$1,202      | \$16,093        | \$1,021     | \$770,842           | \$62,804     |           |
| Solomon Islands       | Lower-middle income | \$1,557         | \$0         | \$5,361         | \$0         | \$1,687         | \$0         | \$29,323        | \$0          | \$35,054        | \$0          | \$2,943         | \$0          | \$125           | \$0         | \$76,050            | \$0          |           |
| Somalia               | Low income          | **              | \$0         | \$26,808        | \$0         | \$28,916        | \$0         | \$117,360       | \$1,097      | \$1,435,182     | \$2,061      | \$306           | **           | **              | \$0         | \$1,608,572         | \$3,158      |           |
| South Africa          | Upper-middle income | \$107,672       | \$0         | \$1,640,801     | \$0         | \$378,203       | \$0         | \$7,789,717     | \$0          | \$23,911,365    | \$0          | \$379,166       | \$0          | \$261,082       | \$0         | \$34,468,006        | \$0          |           |
| South Sudan           | Low income          | \$1,605         | \$0         | \$4,864         | \$0         | **              | \$0         | \$25,714        | \$0          | \$58,594        | \$0          | \$39,564        | **           | **              | \$0         | \$130,341           | \$0          |           |
| Sri Lanka             | Lower-middle income | \$66,056        | \$0         | \$174,849       | \$0         | \$331,410       | \$0         | \$630,464       | \$0          | \$1,285,712     | \$0          | \$501,043       | \$0          | \$9,672         | \$0         | \$2,999,205         | \$0          |           |
| St. Lucia             | Upper-middle income | \$558           | \$0         | \$6,413         | \$0         | \$18,845        | \$0         | \$449,610       | \$0          | \$14,538        | \$0          | \$13,538        | \$0          | \$792           | \$0         | \$490,368           | \$0          |           |
| St. Vincent & Gren.   | Upper-middle income | \$755           | \$0         | \$480           | \$0         | \$1,217         | \$0         | \$14,862        | \$0          | \$247,917       | \$0          | \$4,869         | \$0          | \$154           | \$0         | \$270,254           | \$0          |           |
| Sudan                 | Lower-middle income | \$0             | \$0         | \$49,945        | \$0         | \$20,803        | \$0         | \$247,561       | \$0          | \$2,707,220     | \$0          | \$2,078         | \$0          | \$0             | \$0         | \$3,027,607         | \$0          |           |
| Suriname              | Upper-middle income | \$2,601         | \$0         | \$3,924         | \$0         | \$3,349         | \$0         | \$46,676        | \$0          | \$1,439,600     | \$0          | \$25,090        | \$0          | \$998           | \$0         | \$1,522,238         | \$0          |           |
| Swaziland             | Lower-middle income | \$1,332         | \$0         | \$45,391        | \$0         | \$1,641         | \$0         | \$1,246,193     | \$0          | \$1,976,481     | \$0          | \$188,737       | \$0          | \$12,233        | \$0         | \$3,472,008         | \$0          |           |
| Syria                 | Low income          | \$9,303         | \$0         | \$5,215         | \$0         | \$280,341       | \$0         | \$49,349        | \$0          | \$5,767,536     | \$0          | \$92,647        | \$0          | \$339           | \$0         | \$6,204,732         | \$0          |           |
| Tajikistan            | Low income          | \$0             | \$0         | **              | \$0         | \$8,726         | \$0         | \$446           | \$0          | \$451,744       | \$0          | \$68,766        | \$3,789      | \$0             | \$0         | \$529,682           | \$3,789      |           |
| Tanzania              | Low income          | \$133,025       | \$8,276     | \$406,482       | \$13,098    | \$1,953         | \$2,691     | \$1,990,049     | \$613,873    | \$557,388       | \$430,556    | \$782,174       | \$639,469    | \$6,404         | \$47,126    | \$3,877,476         | \$1,755,088  |           |
| Thailand              | Upper-middle income | \$197,072       | \$0         | \$115,248       | \$0         | \$13,819        | \$0         | \$1,042,547     | \$0          | \$49,693,861    | \$0          | \$249,468       | \$0          | \$4,835         | \$0         | \$51,316,849        | \$0          |           |
| Timor-Leste           | Lower-middle income | \$403           | \$0         | \$0             | \$1,451     | \$823           | **          | \$3,450         | \$262        | \$19,492        | **           | \$503           | \$151        | **              | **          | \$24,672            | \$1,864      |           |
| Togo                  | Low income          | \$867           | \$0         | \$37,488        | \$0         | \$4,666         | \$0         | \$158,862       | \$0          | \$218,782       | \$0          | \$421,453       | \$0          | \$15,226        | \$0         | \$857,344           | \$0          |           |
| Tonga                 | Upper-middle income | \$271           | \$0         | \$193           | \$0         | \$412           | \$0         | \$3,863         | \$0          | \$10,746        | \$0          | \$832           | **           | **              | \$0         | \$16,316            | \$0          |           |
| Tunisia               | Lower-middle income | \$1,087         | \$0         | \$5,251         | \$0         | \$81,804        | \$0         | \$96,027        | \$0          | \$3,230,994     | \$0          | \$38,050        | \$0          | \$5,108         | \$0         | \$3,458,321         | \$0          |           |
| Turkey                | Upper-middle income | \$183,566       | \$0         | \$101,603       | \$0         | \$1,244,687     | \$0         | \$315,450       | \$0          | \$42,386,343    | \$0          | \$3,892,256     | \$0          | \$97,545        | \$0         | \$48,221,450        | \$0          |           |
| Turkmenistan          | Upper-middle income | \$0             | \$0         | **              | \$0         | \$6,807         | \$0         | \$0             | \$0          | \$22,258        | \$0          | \$8,000         | \$0          | **              | \$0         | \$37,065            | \$0          |           |
| Tuvalu                | Upper-middle income | **              | \$0         | \$130           | \$0         | **              | \$0         | \$722           | \$0          | \$1,863         | \$0          | \$104           | \$0          | **              | \$0         | \$2,818             | \$0          |           |
| Uganda                | Low income          | \$18,996        | \$15,572    | \$0             | \$293,574   | \$0             | \$1,921     | \$5,012,579     | \$41,612     | \$508,700       | \$33,258     | \$225,009       | \$217,912    | \$102,517       | \$44,883    | \$5,867,802         | \$648,733    |           |
| Ukraine               | Lower-middle income | \$1,063         | \$0         | \$106,877       | \$0         | \$260,789       | \$0         | \$3,723         | \$0          | \$2,753,846     | \$0          | \$2,706,801     | \$0          | \$172,818       | \$0         | \$6,005,917         | \$0          |           |
| Uzbekistan            | Lower-middle income | \$608           | \$0         | \$1,963         | \$0         | \$80,973        | \$0         | \$0             | \$0          | \$541,141       | \$0          | \$8,976         | \$0          | \$4,677         | \$0         | \$638,337           | \$0          |           |
| Vanuatu               | Lower-middle income | \$919           | \$0         | \$921           | \$0         | \$1,132         | \$0         | \$18,625        | \$0          | \$130,850       | \$0          | \$3,791         | \$0          | \$354           | \$0         | \$156,592           | \$0          |           |
| Vietnam               | Lower-middle income | \$26,596        | \$0         | \$172,234       | \$1,504     | \$3,010,598     | \$0         | \$71,166        | **           | \$22,706,969    | **           | \$3,277,723     | \$0          | \$106           | \$0         | \$29,265,392        | \$1,504      |           |
| Yemen                 | Low income          | \$42,251        | \$0         | \$81,800        | \$0         | \$291,122       | \$0         | \$617,925       | \$0          | \$14,445,725    | \$0          | \$39,080        | \$0          | **              | \$0         | \$15,515,903        | \$0          |           |
| Zambia                | Lower-middle income | \$19,415        | **          | \$8,662         | \$9,290     | \$0             | \$317       | \$247,473       | \$3,365      | \$1,058,770     | \$14,893     | \$81,700        | \$84,696     | \$22,325        | \$1,736     | \$1,438,346         | \$114,298    |           |
| Zimbabwe              | Low income          | \$5,954         | \$2,836     | \$51,053        | \$35,531    | \$0             | \$377       | \$167,279       | \$26,577     | \$1,839,676     | \$639,027    | \$32,758        | \$207,864    | \$10,131        | \$9,683     | \$2,106,851         | \$921,896    |           |
| Low income*           |                     | \$722,409       | \$131,775   | \$1,505,986     | \$884,526   | \$1,855,816     | \$19,025    | \$12,709,573    | \$3,905,227  | \$30,949,324    | \$2,753,543  | \$7,085,965     | \$2,722,282  | \$646,326       | \$943,566   | \$55,475,400        | \$11,359,944 |           |
| Lower-middle income*  |                     | \$14,743,472    | \$168,917   | \$9,847,944     | \$2,359,807 | \$21,155,370    | \$270,955   | \$123,690,430   | \$7,557,432  | \$312,850,624   | \$14,410,936 | \$70,275,205    | \$9,923,601  | \$3,525,386     | \$3,038,689 | \$556,088,431       | \$37,730,336 |           |
| Upper-middle income*  |                     | \$7,400,422     | \$0         | \$16,451,818    | \$214       | \$18,405,925    | \$5         | \$136,898,895   | \$1,858      | \$1,824,255,585 | \$1,858      | \$58,974,432    | \$42,562     | \$3,684,337     | \$511       | \$2,066,071,412     | \$45,149     |           |
| Total                 |                     | \$22,866,303    | \$300,692   | \$27,805,747    | \$3,244,546 | \$41,417,112    | \$289,985   | \$273,298,898   | \$11,464,517 | \$2,168,055,533 | \$17,164,478 | \$136,335,602   | \$12,688,445 | \$7,856,049     | \$3,982,766 | \$2,677,635,244     | \$49,135,429 |           |

\*\* A value of <100 was suppressed. These small OOP expenditure estimates are a result of the methodology of average annual changes in method mix which introduce very small shares of methods not previously being used in the country.  
 \*Totals may not match exactly to values summed by country because country estimates of <100 have been suppressed

Note: Additional country level data is available in the Data Annex of the 2019 Commodity Gap Analysis available at [rhesupplies.org/cga](https://supplies.org/cga)
