# Supplementary material for: Estimating private sector out-of-pocket expenditures on family planning commodities in low-and-middle-income countries
Source: PubMed Central journal article supplement — BMJ Glob Health. 2021 Apr 12;6(4):e004635. doi: 10.1136/bmjgh-2020-004635 (PMC8048017; doi:10.1136/bmjgh-2020-004635), 2021-04-12
Supplement: bmjgh-2020-004635supp004.pdf [file bmjgh-2020-004635supp004.pdf]

## Detailed Results by Country (shown by Grouped Region)

|                                                     | Non Subsidized |          |           |          | Subsidized |         |           |         |
|-----------------------------------------------------|----------------|----------|-----------|----------|------------|---------|-----------|---------|
|                                                     | Implant        | IUD      | Injection | Pill     | Implant    | IUD     | Injection | Pill    |
| <b>Eastern Africa</b>                               |                |          |           |          |            |         |           |         |
| Burundi                                             | \$ 2.28        | \$ 2.28  | \$ 0.57   | \$ 0.22  | \$ 2.28    |         | \$ 0.57   | \$ 0.22 |
| Ethiopia                                            | \$ 1.30        | \$ 3.91  | \$ 0.33   | \$ 0.27  | \$ 1.30    |         | \$ 0.33   | \$ 0.27 |
| Kenya                                               | \$ 9.90        | \$ 15.50 | \$ 0.93   | \$ 0.50  | \$ 9.42    |         | \$ 0.91   |         |
| Madagascar                                          | \$ 0.15        | \$ 6.90  | \$ 0.08   | \$ 0.03  | \$ 0.13    |         | \$ 0.07   | \$ 0.03 |
| Malawi                                              | \$ 14.82       | \$ 6.82  | \$ 1.66   | \$ 1.37  |            |         | \$ 1.66   |         |
| Uganda                                              | \$ 7.23        | \$ 6.55  | \$ 0.34   | \$ 0.17  | \$ 7.23    |         | \$ 0.33   | \$ 0.16 |
| United Republic of Tanzania                         | \$ 2.86        | \$ 0.44  | \$ 0.83   | \$ 0.65  | \$ 1.36    | \$ 0.44 | \$ 0.68   |         |
| Zambia                                              |                |          | \$ 0.71   | \$ 0.57  |            |         | \$ 0.34   |         |
| Zimbabwe                                            | \$ 1.84        |          | \$ 0.57   | \$ 0.25  | \$ 1.67    |         | \$ 0.49   | \$ 0.22 |
| <b>Western Africa</b>                               |                |          |           |          |            |         |           |         |
| Benin                                               |                |          |           | \$ 0.64  |            |         |           |         |
| Burkina Faso                                        | \$ 5.97        |          | \$ 1.29   | \$ 0.52  | \$ 5.97    |         | \$ 1.29   | \$ 0.08 |
| Ghana                                               | \$ 3.55        |          | \$ 0.07   | \$ 0.08  | \$ 3.55    |         | \$ 0.07   | \$ 0.08 |
| Guinea                                              |                |          | \$ 1.04   | \$ 0.34  |            |         |           |         |
| Liberia                                             |                |          | \$ 4.92   | \$ 3.94  |            |         |           |         |
| Mali                                                |                |          | \$ 0.04   | \$ 0.44  |            |         |           |         |
| Niger                                               | \$ 36.32       | \$ 29.24 | \$ 2.00   | \$ 0.62  |            |         |           |         |
| Nigeria                                             | \$ 4.83        | \$ 5.01  | \$ 1.50   | \$ 0.40  | \$ 4.83    |         | \$ 1.50   |         |
| Senegal                                             |                |          | \$ 2.05   | \$ 0.74  |            |         |           |         |
| Sierra Leone                                        |                |          | \$ 1.05   | \$ 0.61  |            |         | \$ 1.04   |         |
| Togo                                                |                |          | \$ 0.91   | \$ 0.49  |            |         |           |         |
| <b>Middle &amp; Southern Africa</b>                 |                |          |           |          |            |         |           |         |
| Angola                                              | \$ 30.00       | \$ 6.00  |           | \$ 1.20  |            |         |           |         |
| Cameroon                                            |                |          | \$ 1.14   | \$ 0.43  |            |         |           |         |
| Chad                                                |                |          |           | \$ 0.62  |            |         |           |         |
| Congo                                               |                |          | \$ 1.09   | \$ 0.60  |            |         |           |         |
| Democratic Republic of the Congo                    | \$ 8.18        | \$ 5.63  | \$ 0.79   | \$ 0.48  | \$ 8.18    |         | \$ 0.79   |         |
| Gabon                                               |                |          | \$ 5.62   | \$ 1.27  |            |         |           |         |
| Namibia                                             |                | \$ 33.94 | \$ 4.01   | \$ 4.65  |            |         | \$ 1.47   |         |
| South Africa                                        | \$ 6.86        | \$ 50.22 | \$ 4.86   | \$ 10.03 | \$ 4.05    |         |           |         |
| Swaziland                                           |                |          | \$ 10.71  | \$ 16.94 |            |         |           |         |
| <b>North Africa &amp; Western Asia &amp; Europe</b> |                |          |           |          |            |         |           |         |
| Albania                                             |                |          |           | \$ 15.19 |            |         |           |         |
| Algeria                                             | \$ 89.81       |          |           | \$ 1.84  |            |         |           |         |
| Azerbaijan                                          |                |          |           | \$ 2.74  |            |         |           |         |
| Bosnia and Herzegovina                              |                |          |           | \$ 7.68  |            |         |           |         |
| Bulgaria                                            |                |          |           | \$ 4.59  |            |         |           |         |
| Egypt                                               |                | \$ 2.51  | \$ 0.55   | \$ 0.59  |            | \$ 0.51 |           |         |
| Jordan                                              |                |          |           | \$ 5.53  |            |         |           |         |
| Lebanon                                             | \$ 151.99      |          |           | \$ 3.68  |            |         |           |         |
| Morocco                                             |                |          |           | \$ 2.06  |            |         |           |         |
| Romania                                             |                |          |           | \$ 3.27  |            |         |           |         |
| Russian Federation                                  | \$ 181.72      |          | \$ 1.92   | \$ 12.58 |            |         |           |         |
| Serbia                                              |                |          |           | \$ 4.61  |            |         |           |         |
| Tunisia                                             |                |          |           | \$ 1.11  |            |         |           |         |
| Turkey                                              | \$ 103.28      |          | \$ 3.75   | \$ 6.70  |            |         |           |         |
| Ukraine                                             |                | \$ 5.00  |           | \$ 1.49  |            |         |           |         |
| <b>Southern, Eastern and Central Asia</b>           |                |          |           |          |            |         |           |         |
| Afghanistan                                         |                |          |           | \$ 1.19  |            |         |           |         |
| Bangladesh                                          |                |          | \$ 0.89   | \$ 0.41  |            |         |           |         |
| Cambodia                                            |                | \$ 0.33  | \$ 0.02   | \$ 0.01  | \$ 0.31    | \$ 0.02 | \$ 0.01   |         |
| India                                               | \$ 16.20       | \$ 6.71  | \$ 3.13   | \$ 0.90  |            |         |           |         |
| Indonesia                                           | \$ 10.03       | \$ 23.37 | \$ 1.35   | \$ 0.66  |            |         |           |         |
| Kazakhstan                                          |                |          |           | \$ 8.04  |            |         |           |         |
| Malaysia                                            | \$ 111.40      |          | \$ 1.65   | \$ 2.86  |            |         |           |         |
| Maldives                                            |                |          |           | \$ 18.60 |            |         |           |         |
| Myanmar                                             | \$ 12.38       | \$ 4.13  | \$ 0.82   | \$ 0.41  |            | \$ 0.82 |           |         |

|                                               | Non Subsidized |          |           |          | Subsidized |     |           |         |
|-----------------------------------------------|----------------|----------|-----------|----------|------------|-----|-----------|---------|
|                                               | Implant        | IUD      | Injection | Pill     | Implant    | IUD | Injection | Pill    |
| Nepal                                         |                |          | \$ 0.28   | \$ 0.15  |            |     | \$ 0.24   | \$ 0.14 |
| Pakistan                                      | \$ 0.87        | \$ 2.00  | \$ 0.77   | \$ 0.52  | \$ 0.87    |     | \$ 0.65   |         |
| Philippines                                   | \$ 10.16       | \$ 9.97  | \$ 2.94   | \$ 1.19  |            |     |           |         |
| Sri Lanka                                     |                |          | \$ 1.12   | \$ 0.93  |            |     |           |         |
| Thailand                                      | \$ 17.57       |          | \$ 0.79   | \$ 3.51  |            |     |           |         |
| Viet Nam                                      | \$ 8.53        |          | \$ 0.72   | \$ 1.13  |            |     |           |         |
| <b>Caribbean, South &amp; Central America</b> |                |          |           |          |            |     |           |         |
| Bolivia (Plurinational State of)              |                | \$ 27.63 | \$ 2.79   | \$ 2.68  |            |     |           |         |
| Brazil                                        | \$ 53.15       |          | \$ 4.40   | \$ 5.17  |            |     |           |         |
| Colombia                                      | \$ 8.57        |          | \$ 6.82   | \$ 10.39 |            |     |           |         |
| Ecuador                                       | \$ 20.89       |          | \$ 5.03   | \$ 5.08  |            |     |           |         |
| Guatemala                                     |                |          | \$ 2.68   | \$ 5.22  |            |     |           |         |
| Guyana                                        |                | \$ 18.33 | \$ 6.95   | \$ 3.78  |            |     |           |         |
| Haiti                                         | \$ 0.75        |          | \$ 0.55   | \$ 0.51  | \$ 0.62    |     | \$ 0.49   |         |
| Honduras                                      |                | \$ 11.33 | \$ 4.13   | \$ 1.91  |            |     |           |         |
| Mexico                                        | \$ 62.58       |          | \$ 4.63   | \$ 11.61 |            |     |           |         |
| Peru                                          | \$ 30.11       | \$ 30.01 | \$ 5.66   | \$ 6.79  |            |     |           |         |

**Summary Statistics Across Countries**

|                                      | Non Subsidized   |                 |                 |                 | Subsidized     |                |                |                |
|--------------------------------------|------------------|-----------------|-----------------|-----------------|----------------|----------------|----------------|----------------|
|                                      | Implant          | IUD             | Injection       | Pill            | Implant        | IUD            | Injection      | Pill           |
| <b>Min</b>                           |                  |                 |                 |                 |                |                |                |                |
| Eastern Africa                       | \$ 0.15          | \$ 0.44         | \$ 0.08         | \$ 0.03         | \$ 0.13        | \$ 0.44        | \$ 0.07        | \$ 0.03        |
| Western Africa                       | \$ 3.55          | \$ 5.01         | \$ 0.04         | \$ 0.08         | \$ 3.55        | n/a            | \$ 0.07        | \$ 0.08        |
| Middle & Southern Africa             | \$ 6.86          | \$ 5.63         | \$ 0.79         | \$ 0.43         | \$ 4.05        | n/a            | \$ 0.79        | n/a            |
| North Africa & Western Asia & Europe | \$ 89.81         | \$ 2.51         | \$ 0.55         | \$ 0.59         | n/a            | n/a            | \$ 0.51        | n/a            |
| Southern, Eastern and Central Asia   | \$ 0.87          | \$ 0.33         | \$ 0.02         | \$ 0.01         | \$ 0.87        | \$ 0.31        | \$ 0.02        | \$ 0.01        |
| Caribbean, South & Central America   | \$ 0.75          | \$ 11.33        | \$ 0.55         | \$ 0.51         | \$ 0.62        | n/a            | \$ 0.49        | n/a            |
| <b>Total</b>                         | <b>\$ 0.15</b>   | <b>\$ 0.33</b>  | <b>\$ 0.02</b>  | <b>\$ 0.01</b>  | <b>\$ 0.13</b> | <b>\$ 0.31</b> | <b>\$ 0.02</b> | <b>\$ 0.01</b> |
| <b>Q1</b>                            |                  |                 |                 |                 |                |                |                |                |
| Eastern Africa                       | \$ 1.70          | \$ 3.10         | \$ 0.34         | \$ 0.22         | \$ 1.33        | \$ 0.44        | \$ 0.33        | \$ 0.16        |
| Western Africa                       | \$ 4.51          | \$ 11.07        | \$ 0.94         | \$ 0.42         | \$ 4.19        | n/a            | \$ 0.80        | \$ 0.08        |
| Middle & Southern Africa             | \$ 7.52          | \$ 5.91         | \$ 1.11         | \$ 0.60         | \$ 5.08        | n/a            | \$ 0.96        | n/a            |
| North Africa & Western Asia & Europe | \$ 99.91         | \$ 3.13         | \$ 1.24         | \$ 1.95         | n/a            | n/a            | \$ 0.51        | n/a            |
| Southern, Eastern and Central Asia   | \$ 9.65          | \$ 2.53         | \$ 0.76         | \$ 0.47         | \$ 0.87        | \$ 0.31        | \$ 0.19        | \$ 0.04        |
| Caribbean, South & Central America   | \$ 11.65         | \$ 16.58        | \$ 3.13         | \$ 2.95         | \$ 0.62        | n/a            | \$ 0.49        | n/a            |
| <b>Total</b>                         | <b>\$ 4.83</b>   | <b>\$ 4.13</b>  | <b>\$ 0.75</b>  | <b>\$ 0.51</b>  | <b>\$ 1.31</b> | <b>\$ 0.34</b> | <b>\$ 0.33</b> | <b>\$ 0.08</b> |
| <b>Median</b>                        |                  |                 |                 |                 |                |                |                |                |
| Eastern Africa                       | \$ 2.57          | \$ 6.55         | \$ 0.57         | \$ 0.27         | \$ 1.67        | \$ 0.44        | \$ 0.49        | \$ 0.22        |
| Western Africa                       | \$ 5.40          | \$ 17.13        | \$ 1.17         | \$ 0.52         | \$ 4.83        | n/a            | \$ 1.17        | \$ 0.08        |
| Middle & Southern Africa             | \$ 8.18          | \$ 19.97        | \$ 4.01         | \$ 1.20         | \$ 6.11        | n/a            | \$ 1.13        | n/a            |
| North Africa & Western Asia & Europe | \$ 127.64        | \$ 3.76         | \$ 1.92         | \$ 3.68         | n/a            | n/a            | \$ 0.51        | n/a            |
| Southern, Eastern and Central Asia   | \$ 11.27         | \$ 5.42         | \$ 0.86         | \$ 0.93         | \$ 0.87        | \$ 0.31        | \$ 0.45        | \$ 0.07        |
| Caribbean, South & Central America   | \$ 25.50         | \$ 22.98        | \$ 4.52         | \$ 5.12         | \$ 0.62        | n/a            | \$ 0.49        | n/a            |
| <b>Total</b>                         | <b>\$ 10.03</b>  | <b>\$ 6.71</b>  | <b>\$ 1.14</b>  | <b>\$ 1.19</b>  | <b>\$ 2.92</b> | <b>\$ 0.37</b> | <b>\$ 0.57</b> | <b>\$ 0.14</b> |
| <b>Q3</b>                            |                  |                 |                 |                 |                |                |                |                |
| Eastern Africa                       | \$ 7.90          | \$ 6.86         | \$ 0.83         | \$ 0.57         | \$ 4.76        | \$ 0.44        | \$ 0.68        | \$ 0.22        |
| Western Africa                       | \$ 13.56         | \$ 23.18        | \$ 1.88         | \$ 0.63         | \$ 5.40        | n/a            | \$ 1.34        | \$ 0.08        |
| Middle & Southern Africa             | \$ 19.09         | \$ 38.01        | \$ 5.24         | \$ 4.65         | \$ 7.14        | n/a            | \$ 1.30        | n/a            |
| North Africa & Western Asia & Europe | \$ 159.42        | \$ 4.38         | \$ 2.84         | \$ 6.11         | n/a            | n/a            | \$ 0.51        | n/a            |
| Southern, Eastern and Central Asia   | \$ 16.54         | \$ 9.15         | \$ 1.42         | \$ 2.03         | \$ 0.87        | \$ 0.31        | \$ 0.69        | \$ 0.11        |
| Caribbean, South & Central America   | \$ 47.39         | \$ 28.23        | \$ 5.50         | \$ 6.40         | \$ 0.62        | n/a            | \$ 0.49        | n/a            |
| <b>Total</b>                         | <b>\$ 30.11</b>  | <b>\$ 18.33</b> | <b>\$ 3.44</b>  | <b>\$ 4.59</b>  | <b>\$ 5.68</b> | <b>\$ 0.41</b> | <b>\$ 0.91</b> | <b>\$ 0.22</b> |
| <b>Max</b>                           |                  |                 |                 |                 |                |                |                |                |
| Eastern Africa                       | \$ 14.82         | \$ 15.50        | \$ 1.66         | \$ 1.37         | \$ 9.42        | \$ 0.44        | \$ 1.66        | \$ 0.27        |
| Western Africa                       | \$ 36.32         | \$ 29.24        | \$ 4.92         | \$ 3.94         | \$ 5.97        | n/a            | \$ 1.50        | \$ 0.08        |
| Middle & Southern Africa             | \$ 30.00         | \$ 50.22        | \$ 10.71        | \$ 16.94        | \$ 8.18        | n/a            | \$ 1.47        | n/a            |
| North Africa & Western Asia & Europe | \$ 181.72        | \$ 5.00         | \$ 3.75         | \$ 15.19        | n/a            | n/a            | \$ 0.51        | n/a            |
| Southern, Eastern and Central Asia   | \$ 111.40        | \$ 23.37        | \$ 3.13         | \$ 18.60        | \$ 0.87        | \$ 0.31        | \$ 0.82        | \$ 0.14        |
| Caribbean, South & Central America   | \$ 62.58         | \$ 30.01        | \$ 6.95         | \$ 11.61        | \$ 0.62        | n/a            | \$ 0.49        | n/a            |
| <b>Total</b>                         | <b>\$ 181.72</b> | <b>\$ 50.22</b> | <b>\$ 10.71</b> | <b>\$ 18.60</b> | <b>\$ 9.42</b> | <b>\$ 0.44</b> | <b>\$ 1.66</b> | <b>\$ 0.27</b> |
