# Supplementary figures and images for: Estimating private sector out-of-pocket expenditures on family planning commodities in low-and-middle-income countries
Source: PubMed Central journal article supplement — BMJ Glob Health. 2021 Apr 12;6(4):e004635. doi: 10.1136/bmjgh-2020-004635 (PMC8048017; doi:10.1136/bmjgh-2020-004635), 2021-04-12

## Supplemental Appendix 1: Summary Diagram of Methods

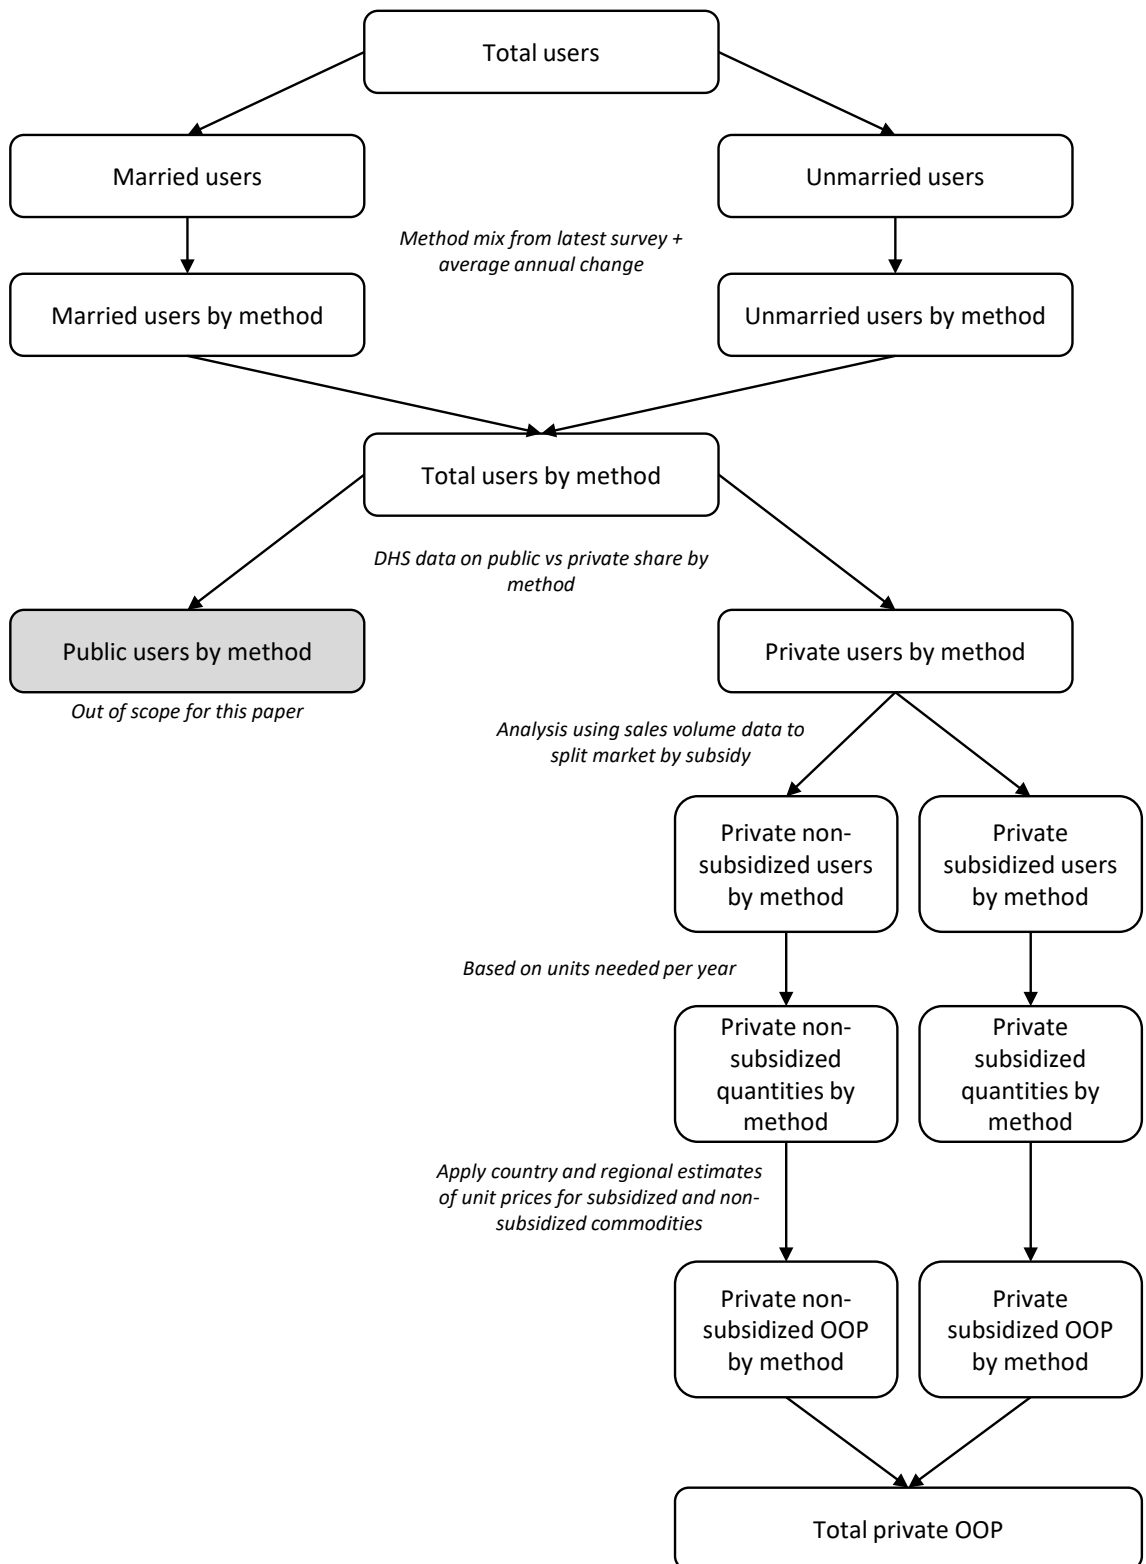

Supplement: bmjgh-2020-004635supp001.pdf [file bmjgh-2020-004635supp001.pdf]
